# Supplementary material
Source: publisher site journal article supplement (https://www.dovepress.com/article/402624)

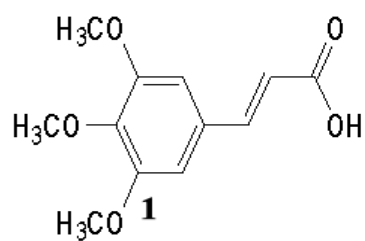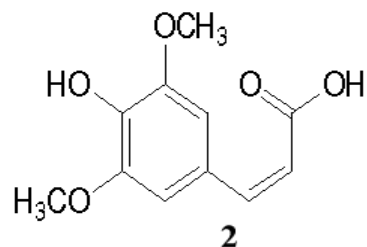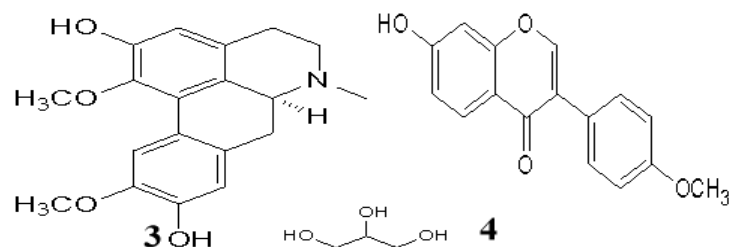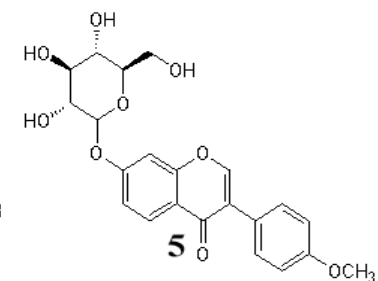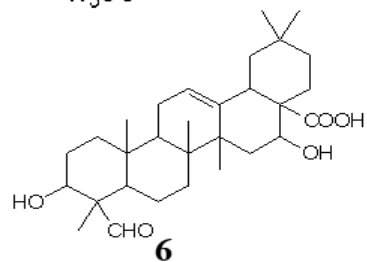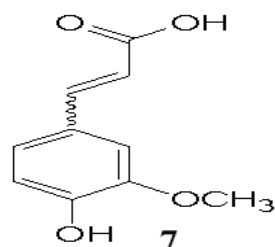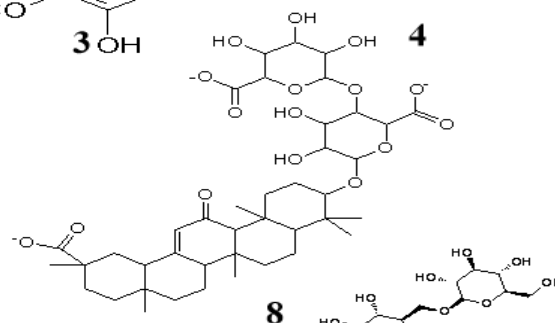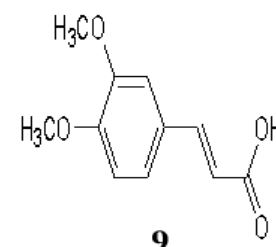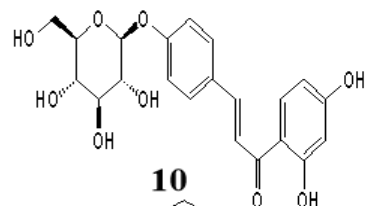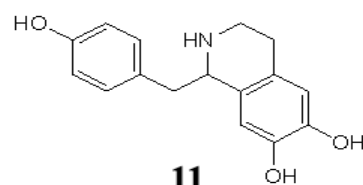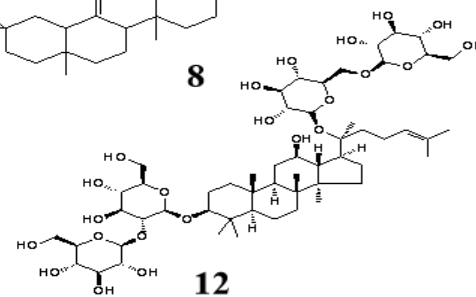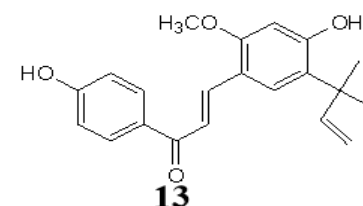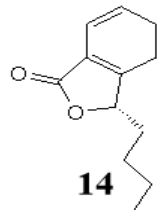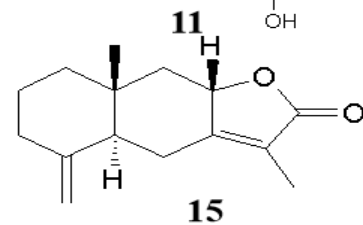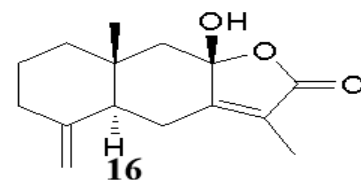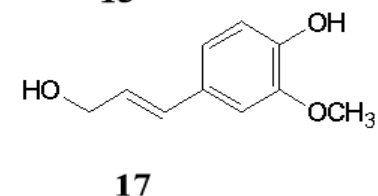

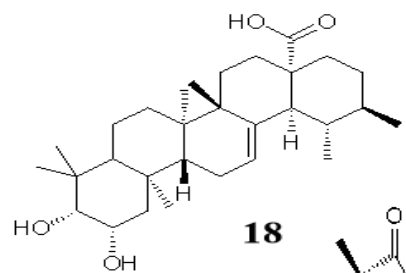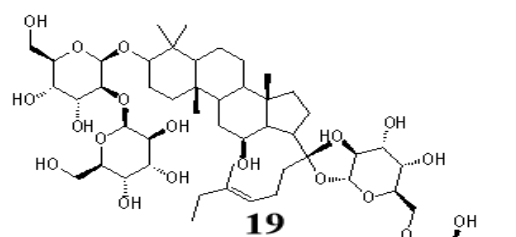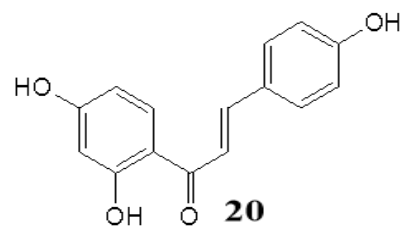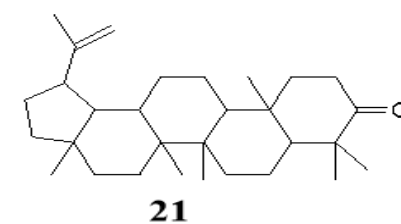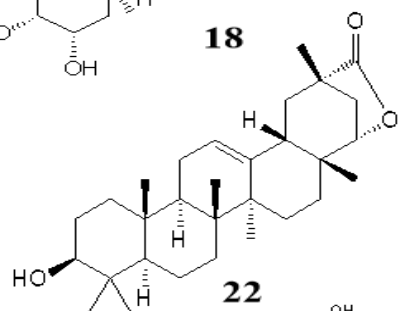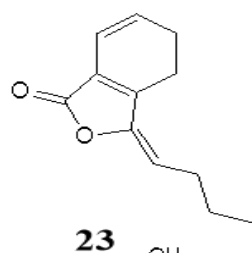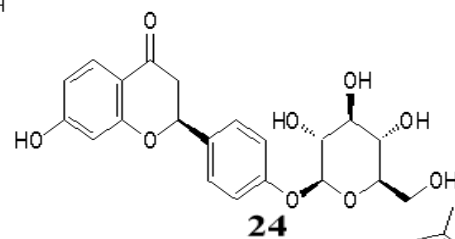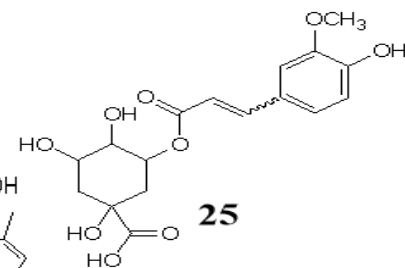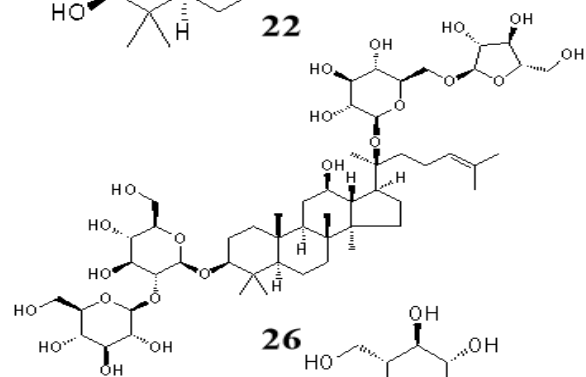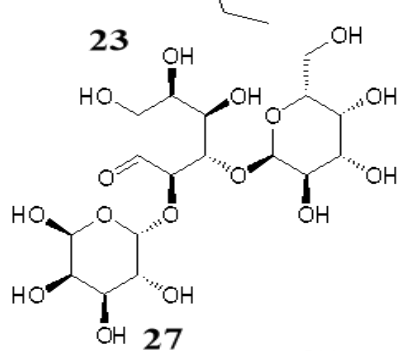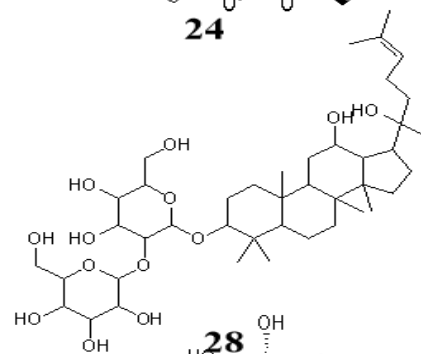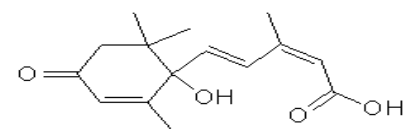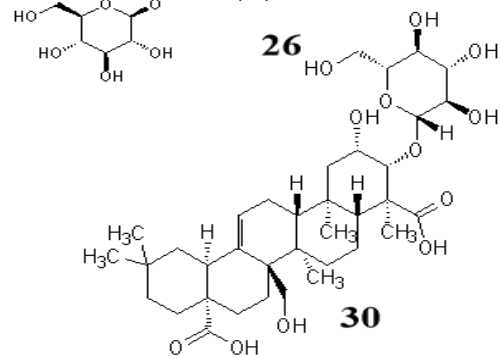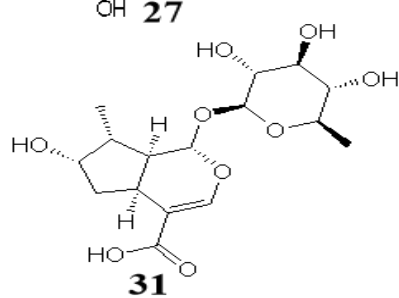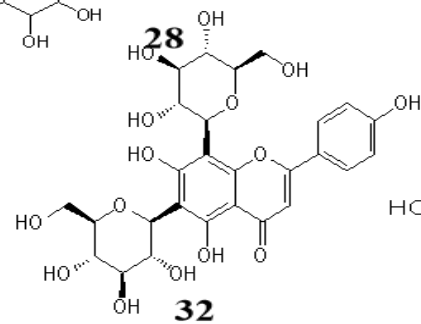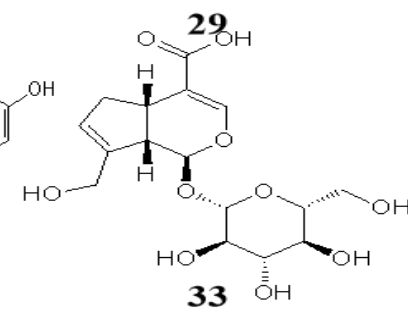

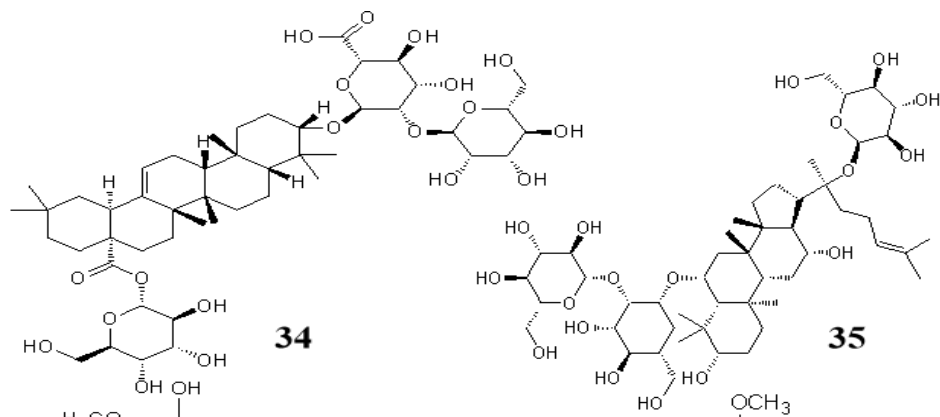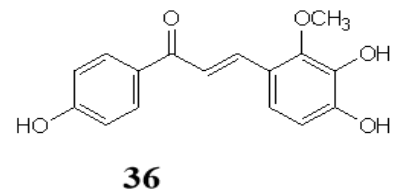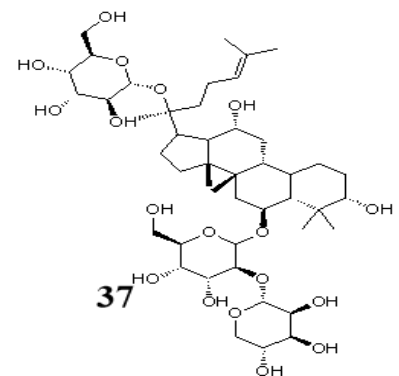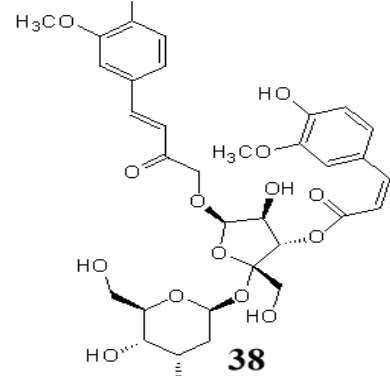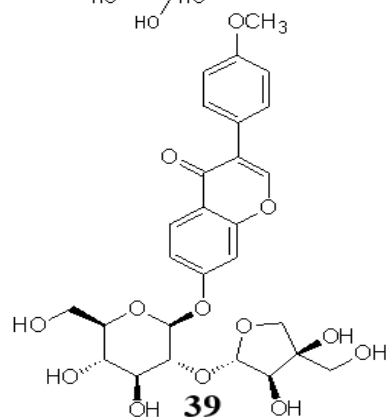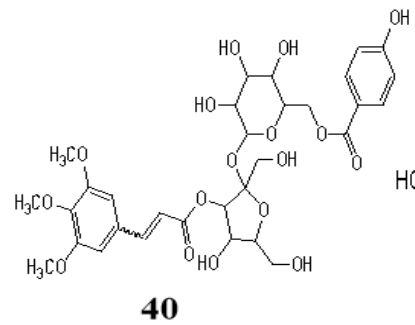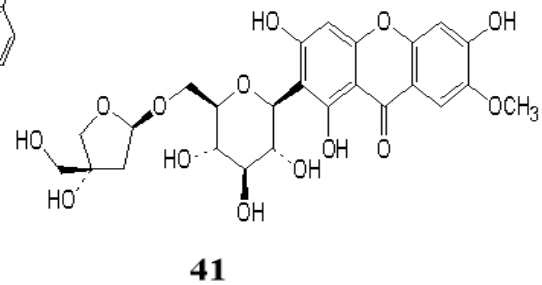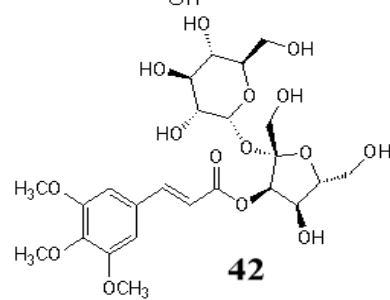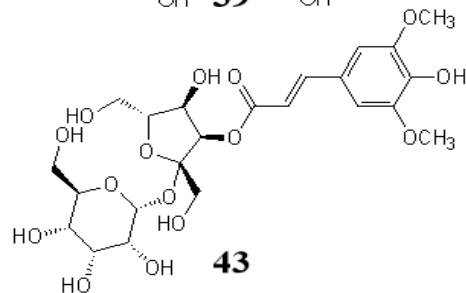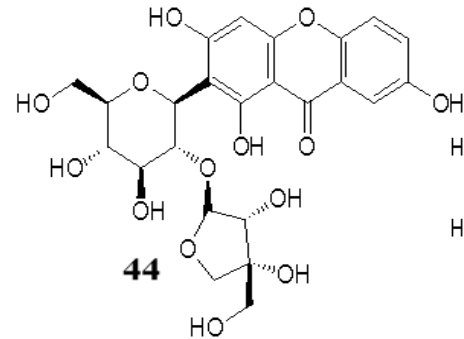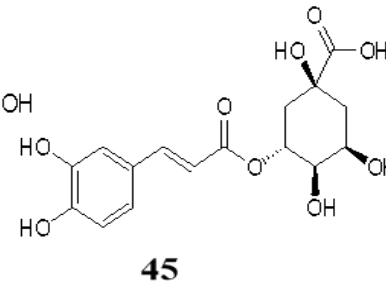

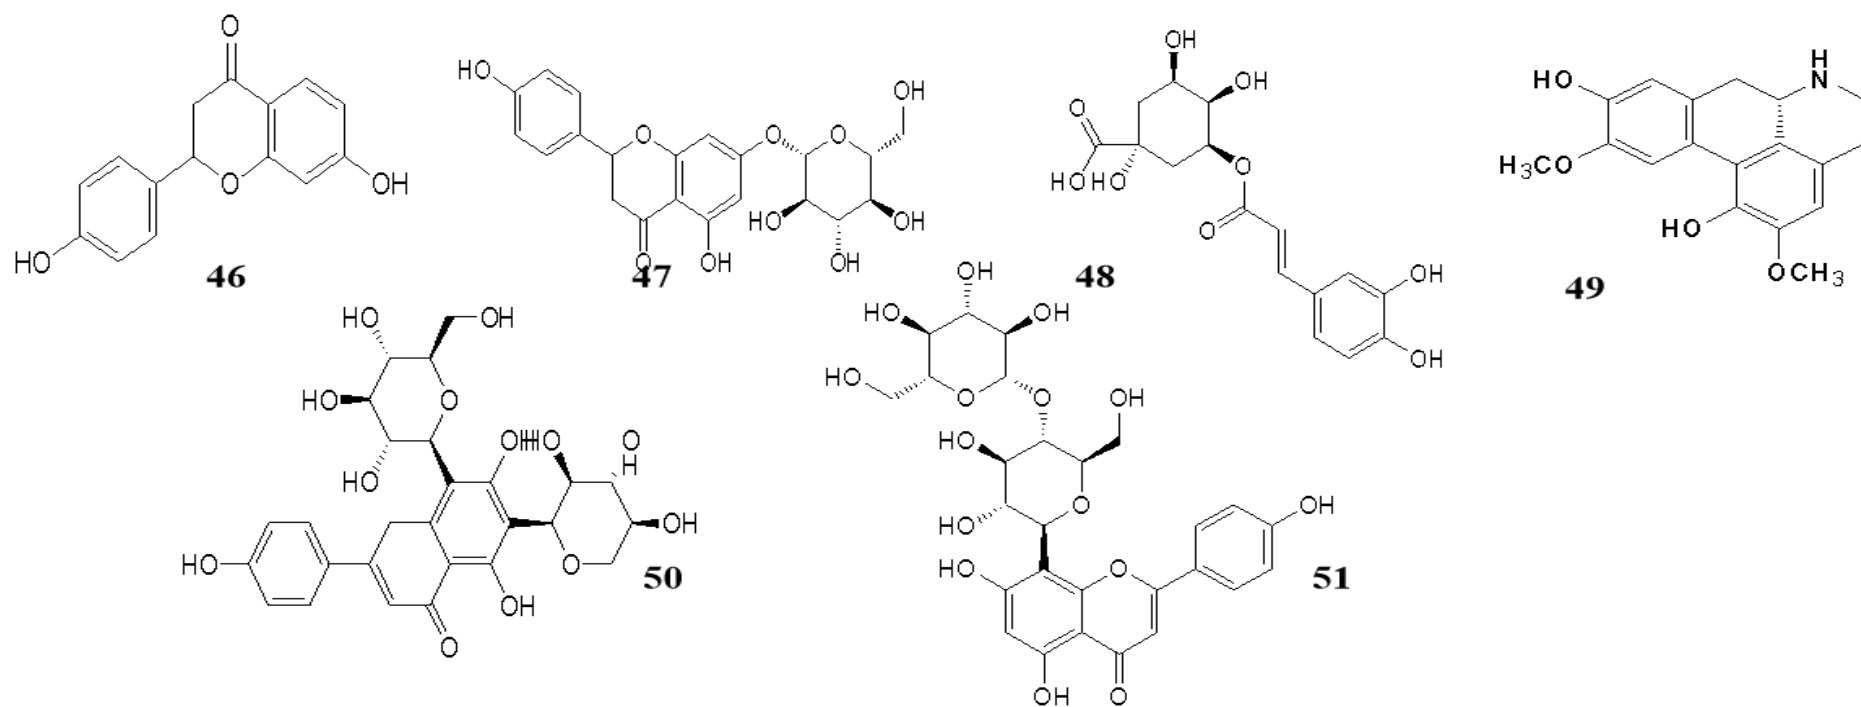

Supplementary Figure 1 The structural formula of QFY components entering into blood and brain.

Supplement: Supplementary file 1 [file get_supplementary_file.php]
